# Supplementary material for: Novel carbon polymorphs with cumulative double bonds in three-dimensional sp–sp2 hybrid framework
Source: Royal Society of Chemistry journal article supplement (doi:10.1039/c8cp00107c), 2018-01-01
Supplement: c8cp00107c1.pdf [file c8cp00107c1.pdf]

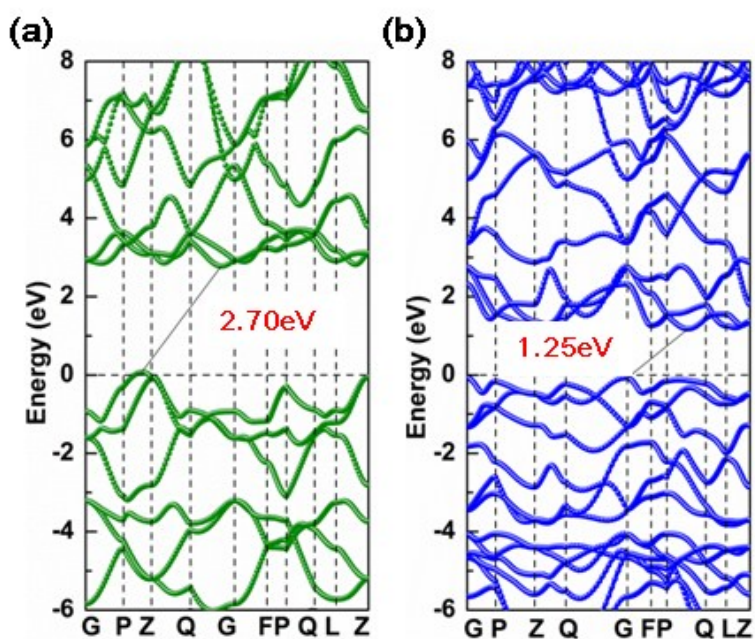

**Figure S1** Electronic band structures along the high symmetry point in the Brillouin zone of Trig-C<sub>9</sub> (a) and Trig-C<sub>15</sub> (b) based on the HSE06 calculations
